# Supplementary material
Source: MDPI journal article supplement (https://www.mdpi.com/2624-795X/5/2/22)
Supplement: s1 [file s1]

# Geoinformatics based Mapping of Environmental Sensitive Areas for Desertification over Satara and Sangli districts of Maharashtra, India

Chandra Shekhar Dwivedi <sup>1</sup>, Dishant <sup>1</sup>, Bikash Ranjan Parida <sup>1</sup>, Arvind Chandra Pandey <sup>1</sup>, Ravi Kumar <sup>1</sup> and Navneet Kumar <sup>2,3\*</sup>

<sup>1</sup> Department of Geoinformatics, School of Natural Resource Management, Central University of Jharkhand, Ranchi 835222, India; chandra.dwivedi@cuja.ac.in; kumardishant21@gmail.com; bikash.parida@cuja.ac.in; arvind.pandey@cuja.ac.in; ravi210748@gmail.com

<sup>2</sup> Department of Ecology and Natural Resources Management, Center for Development Research (ZEF), University of Bonn, 53113 Bonn, Germany; nkumar@uni-bonn.de

<sup>3</sup> Global Mountain Safeguard Research (GLOMOS), United Nations University - Institute for Environment and Human Security (UNU-EHS), UN Campus, Platz der Vereinten Nationen 1, 53113 Bonn, Germany

\* Correspondence: nkumar@uni-bonn.de

## Supplement Figures & Tables

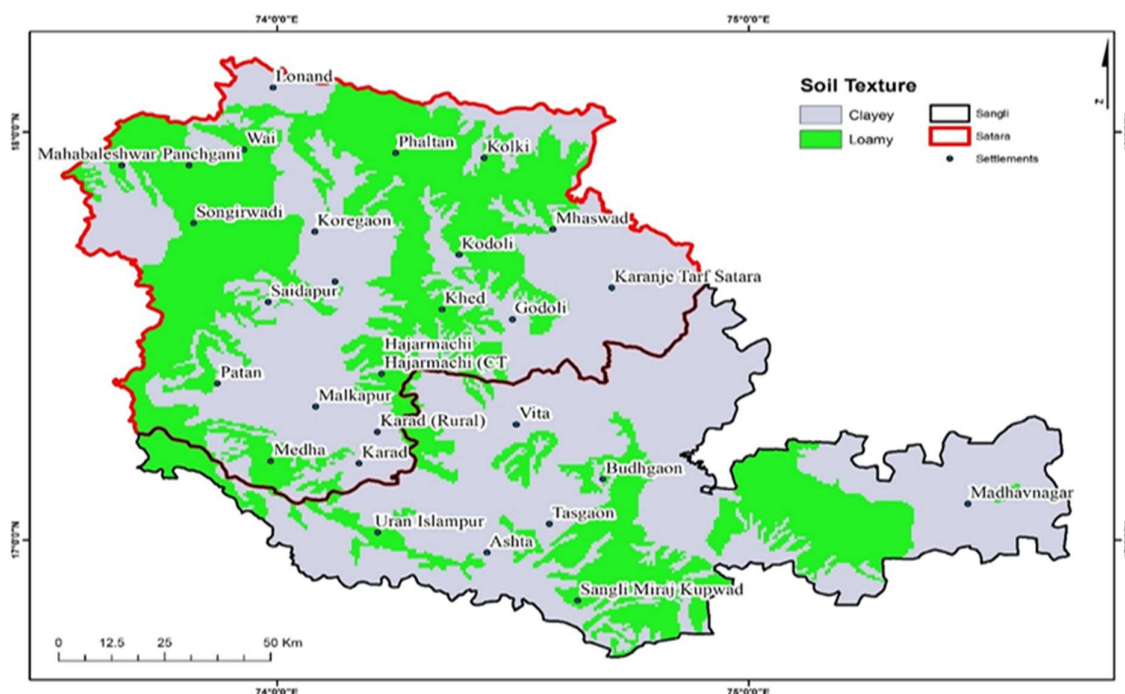

Figure S1. Soil texture map the study area.

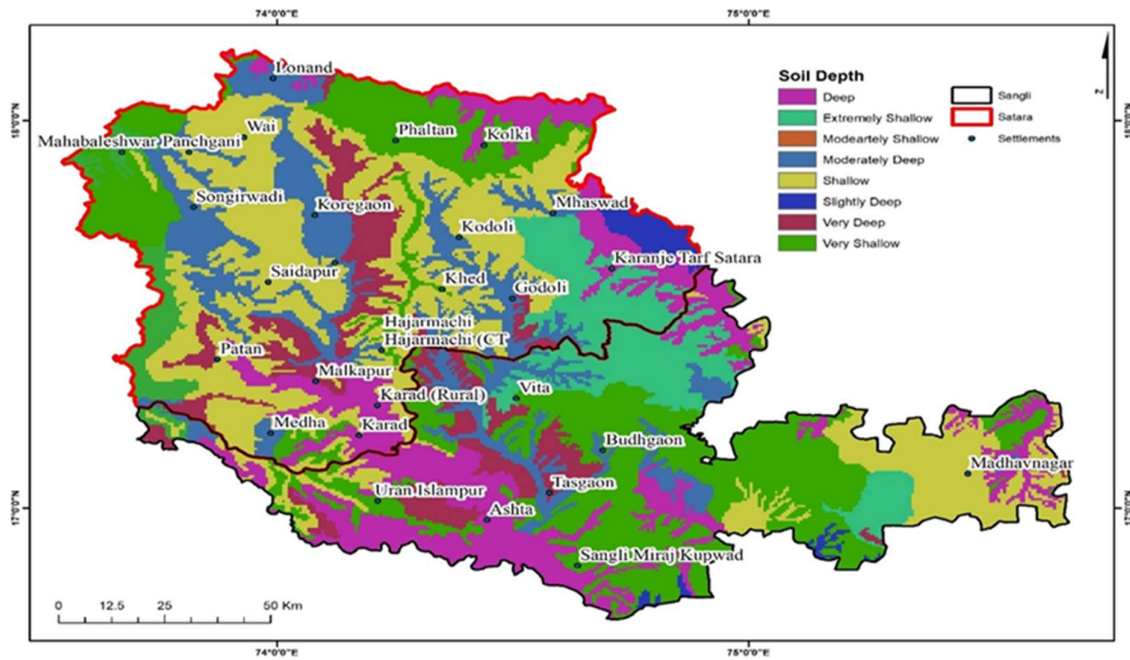

Figure S2. Soil depth map.

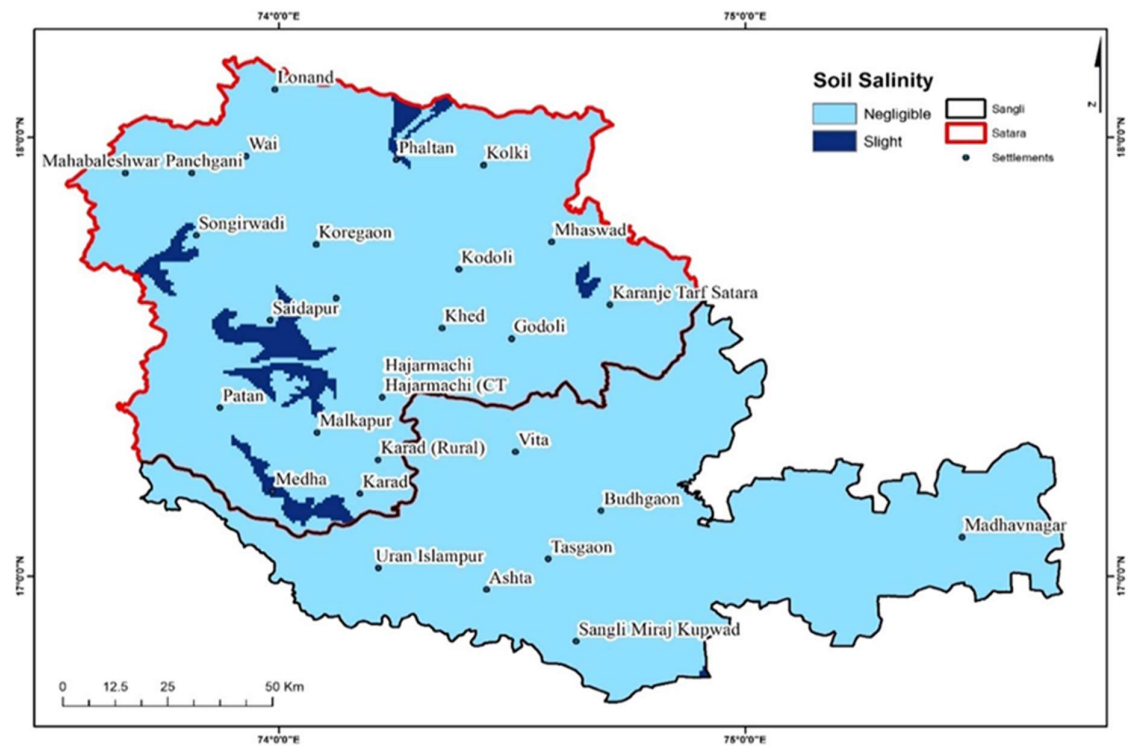

Figure S3. Soil salinity map of the study area.

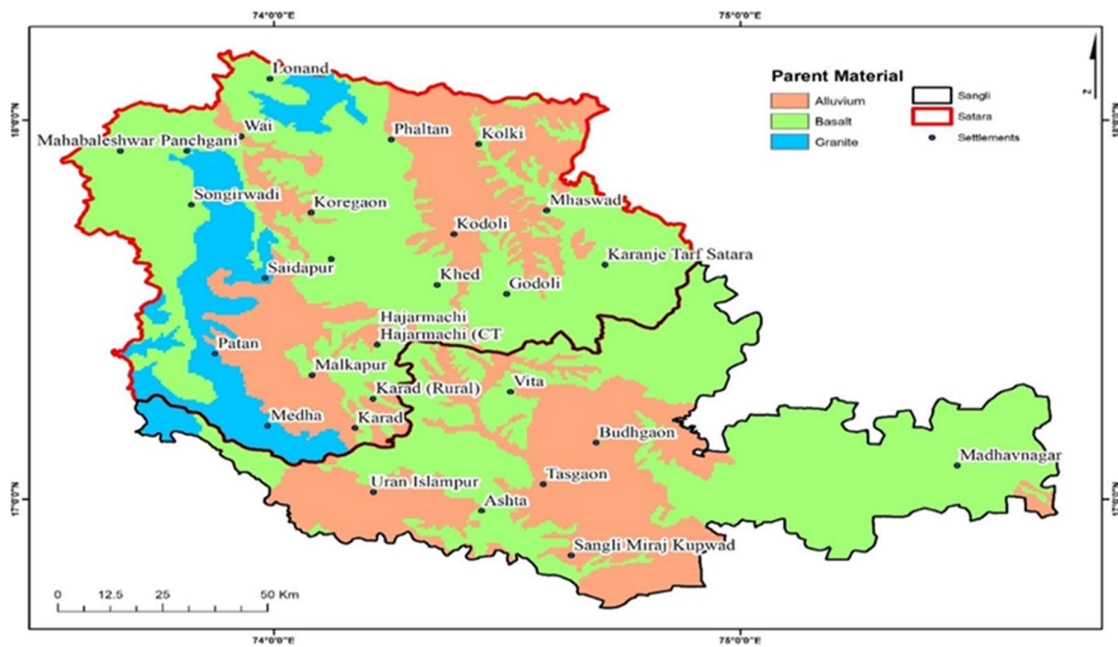

Figure S4. Parent material map of the study area (Source: NBSS&LUP).

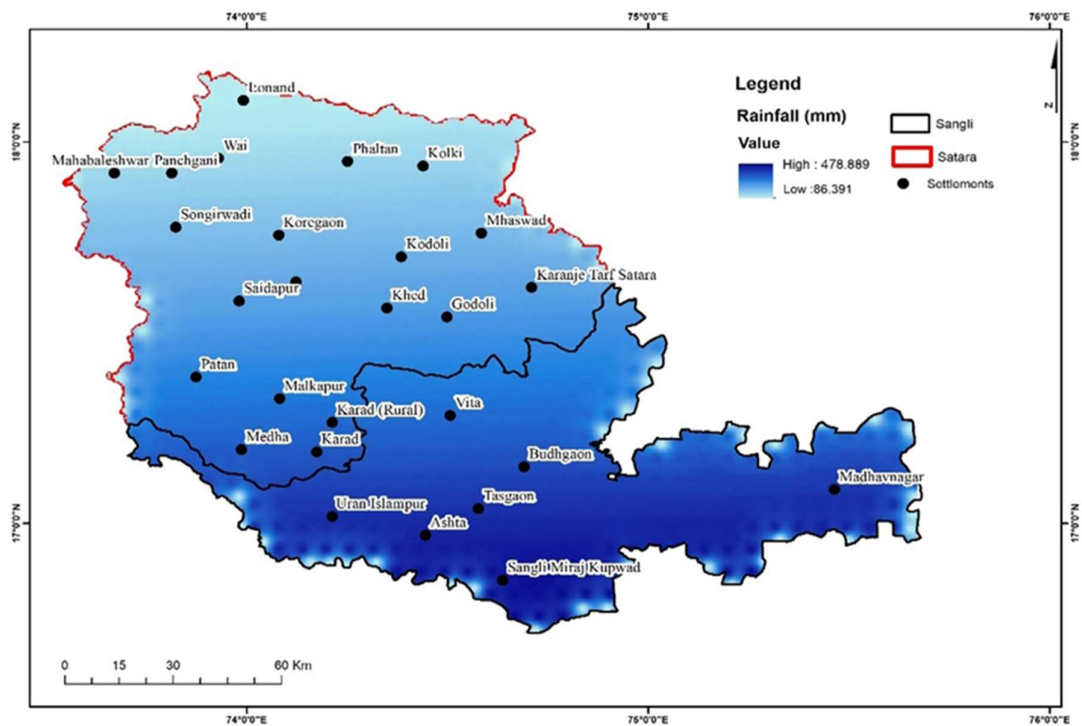

Figure S5. Average annual rainfall map of the study area.

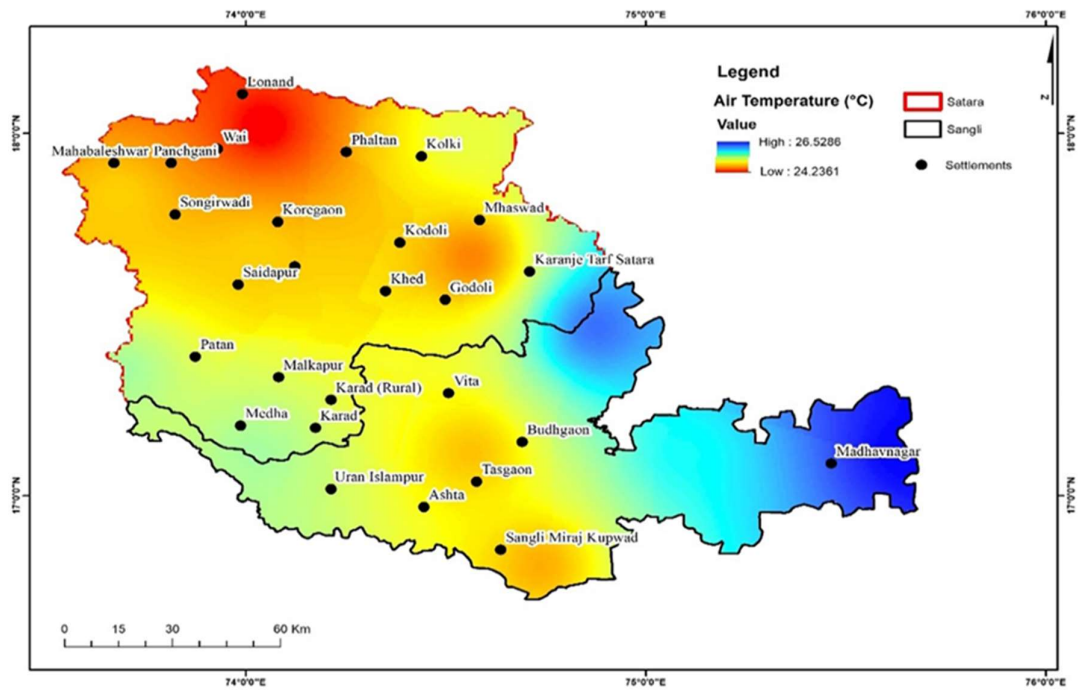

Figure S6. Average annual air temperature map of the study area.

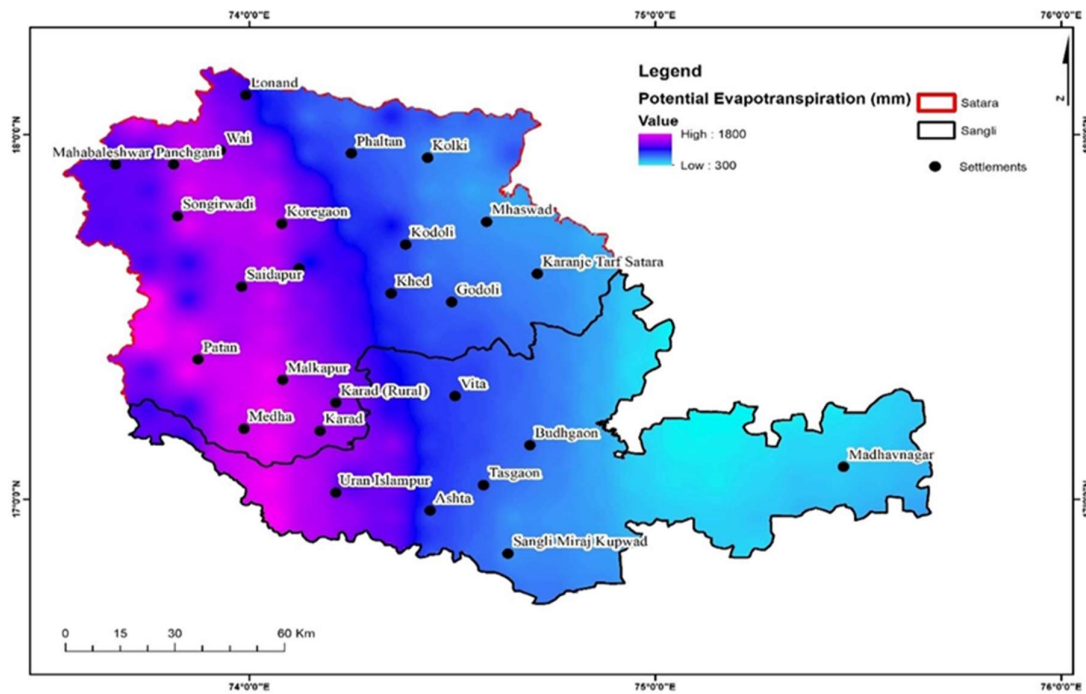

Figure S7. Average annual potential evapotranspiration (PET) map of the study area.



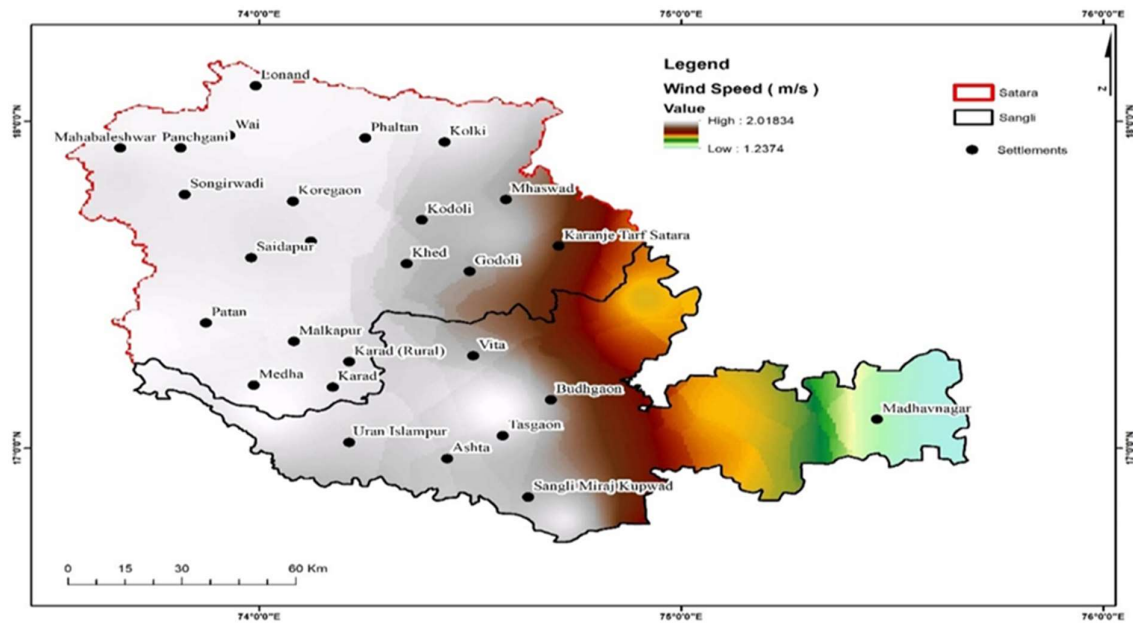

Figure S8. Average wind speed map of the study area.

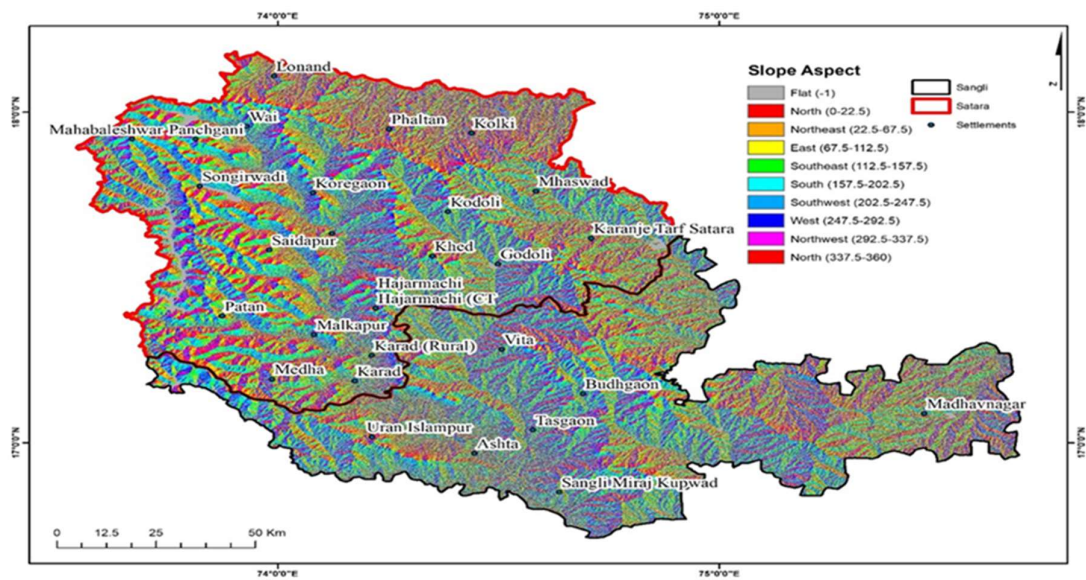

Figure S9. Slope aspect map.

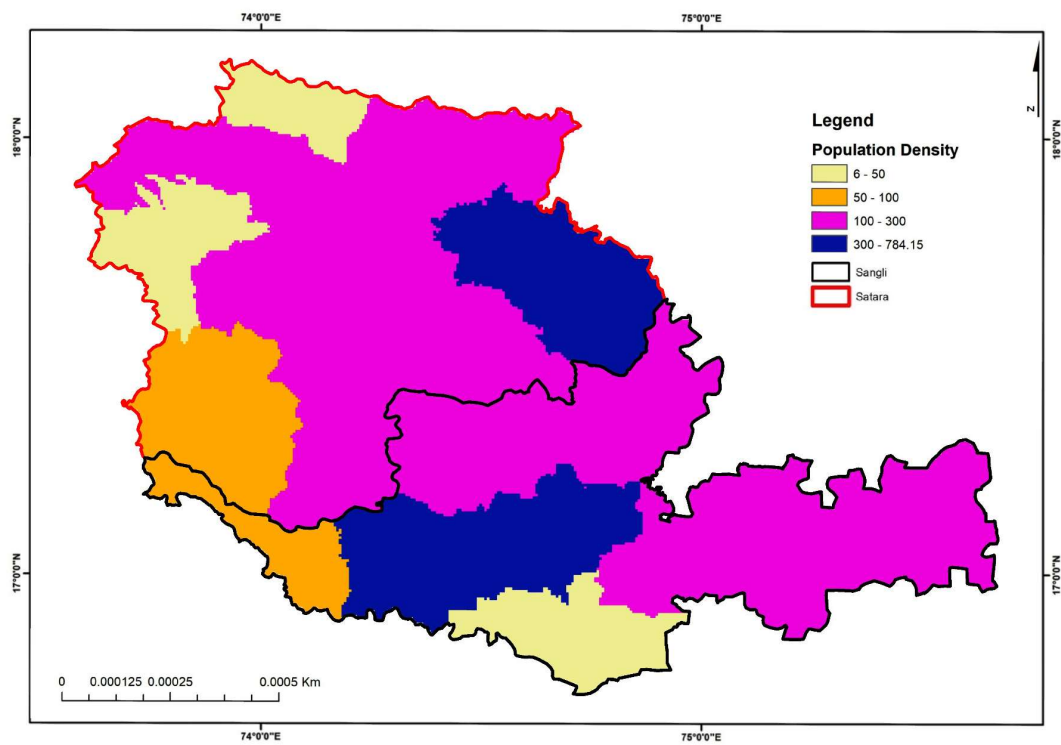

Figure S10. Population density block wise 2011.

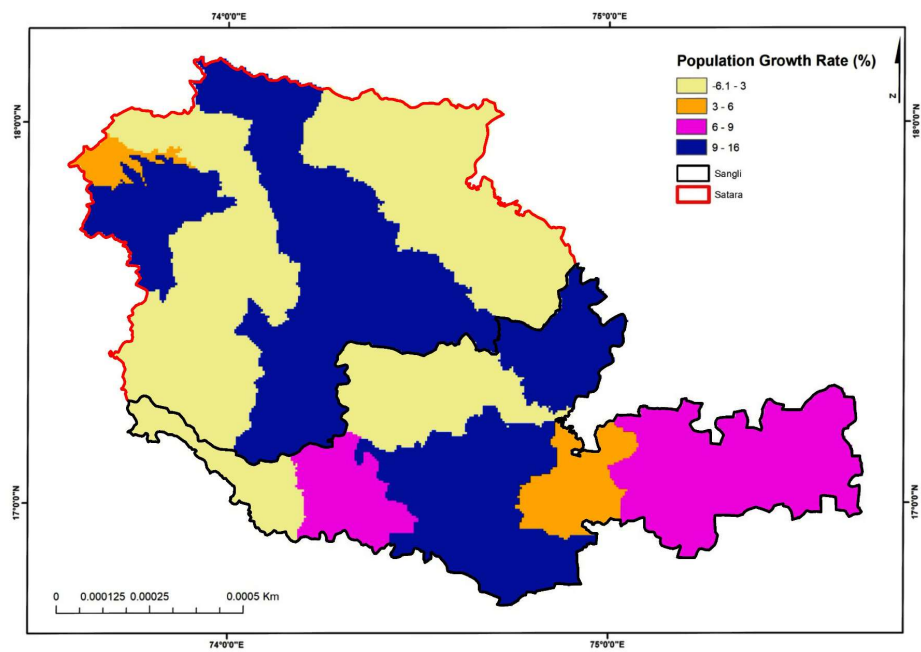

Figure S11. Population Growth Rate (%) 2011.

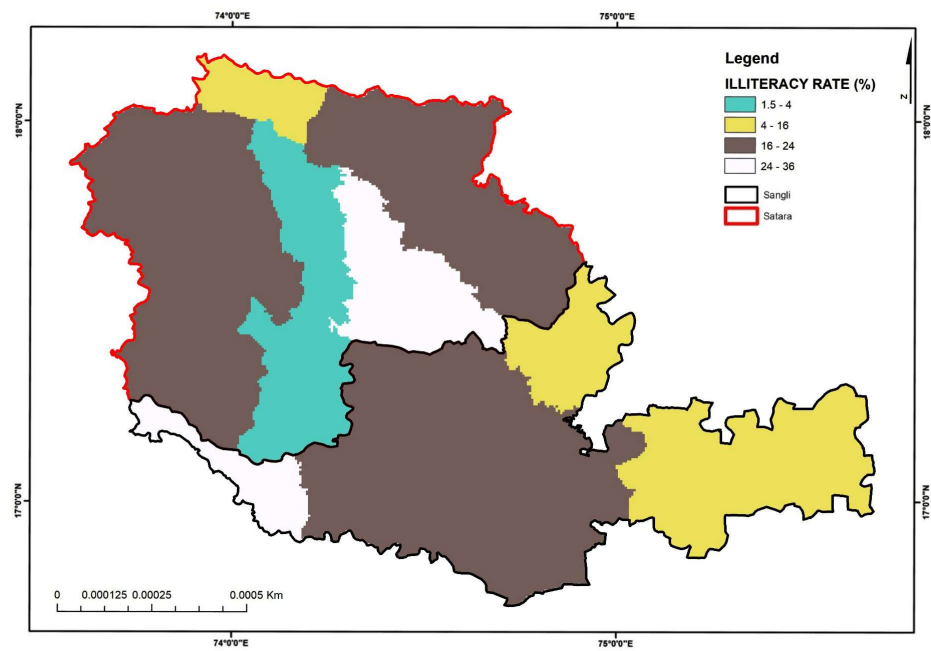

Figure S12. Illiteracy Rate (%) 2011 Block Wise.

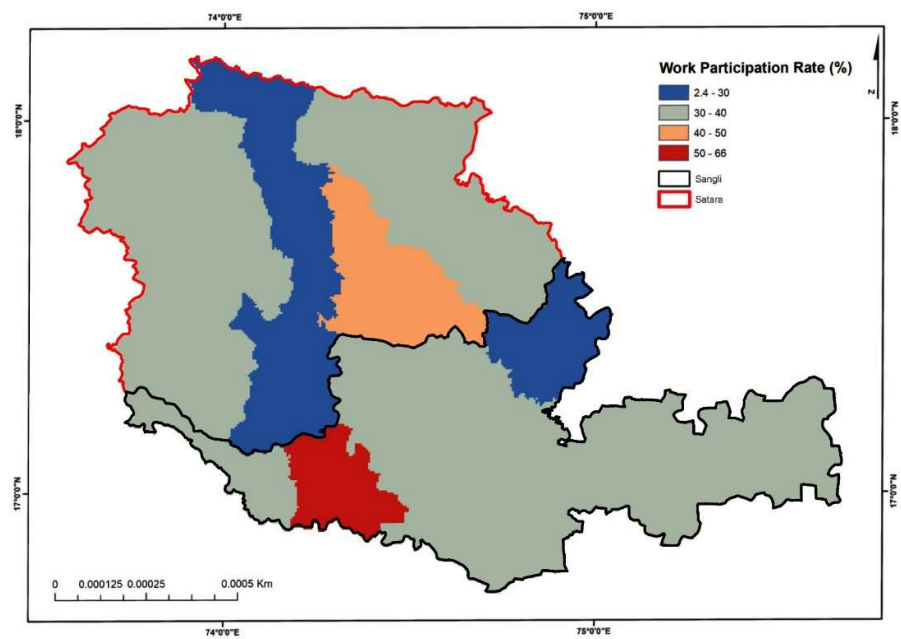

Figure S13. Work Participation Rate (%) 2011.

**Table S1.** The soil Quality Index (SQI) indicator, their classes and assigned weights.

| Indicators                | Class                               | Weight |
|---------------------------|-------------------------------------|--------|
| 1. Soil texture           | Clayey                              | 1      |
|                           | Loamy                               | 2      |
| 2. Soil depth             | Deep, Very deep                     | 1      |
|                           | Moderately deep                     | 1.2    |
|                           | Moderately shallow                  | 1.4    |
|                           | Shallow                             | 1.6    |
|                           | Very shallow                        | 1.8    |
|                           | Extremely shallow                   | 2      |
| 3. Soil drainage          | Well, Somewhat excessive, Excessive | 1      |
|                           | Moderately well                     | 1.2    |
|                           | Imperfect                           | 1.4    |
|                           | Poor                                | 1.6    |
|                           | Very poor                           | 1.8    |
|                           | Extremely poor                      | 2      |
| 4. Parent material        | Granite                             | 1      |
|                           | Basalt                              | 1.5    |
|                           | Alluvium                            | 2      |
| 5. Soil salinity          | Negligible                          | 1      |
|                           | Slight                              | 2      |
| 6. Degree of soil erosion | None to very slight                 | 1      |
|                           | Slight                              | 1.3    |
|                           | Moderate                            | 1.5    |
|                           | Severe                              | 1.8    |
|                           | Very severe                         | 2      |
| 7. Slope gradient (%)     | 0                                   | 1      |
|                           | 1–5                                 | 1.2    |
|                           | 6–10                                | 1.4    |
|                           | 11–15                               | 1.6    |
|                           | 16–20                               | 1.7    |
|                           | 21–25                               | 1.8    |
|                           | 26–30                               | 1.9    |
|                           | 31–35                               | 2      |

**Table S2.** Area under different slope gradient.

| Class | Soil gradient (degree) | Area (%) |
|-------|------------------------|----------|
| 1.    | 0                      | 45.31    |
| 2.    | 1–5                    | 38.24    |
| 3.    | 6–10                   | 8.56     |
| 4.    | 11–15                  | 4.81     |
| 5.    | 16–20                  | 2.81     |
| 6.    | 21–25                  | 0.08     |
| 7.    | 26–30                  | 0.004    |
| 8.    | 31–35                  | 0.16     |



**Table S3.** Area under different soil drainage.

| Class | Soil drainage   | Area (%) |
|-------|-----------------|----------|
| 1.    | Excessive       | 14.04    |
| 2.    | Imperfect       | 9.31     |
| 3.    | Moderately Well | 16.09    |
| 4.    | Well            | 60.21    |

**Table S4.** The Vegetation Quality Index (VQI) indicator, their classes and assigned weights.

| Indicators              | Class           | Weight |
|-------------------------|-----------------|--------|
| 1. Vegetation cover (%) | > 80            | 1      |
|                         | 60–80           | 1.25   |
|                         | 60–40           | 1.50   |
|                         | 40–20           | 1.75   |
|                         | 10–20           | 1.9    |
|                         | <10             | 2      |
| 2. LULC                 | Water Bodies    | 1      |
|                         | Built-up land   | 1.3    |
|                         | Dense forest    | 1.4    |
|                         | Crop land       | 1.6    |
|                         | Land with Scrub | 1.8    |
|                         | Fallow Land     | 1.9    |
|                         | Barren Land     | 2      |

**Table S5.** The Climate Quality Index (CQI) indicator, their classes and assigned weights.

| Indicators                                          | Class                      | Weight |
|-----------------------------------------------------|----------------------------|--------|
| 1. Average Annual Rainfall                          | 339.91–478.88              | 1      |
|                                                     | 227.23–339.91              | 1.3    |
|                                                     | 116.43–227.23              | 1.6    |
|                                                     | < 116.43                   | 2      |
| 2. Average annual air temperature (°C)              | < 24                       | 1      |
|                                                     | 24–25                      | 1.3    |
|                                                     | 25–26                      | 1.6    |
|                                                     | >26                        | 2      |
| 3. Average annual potential evapotranspiration (mm) | < 300                      | 1      |
|                                                     | 300–600                    | 1.2    |
|                                                     | 600–1200                   | 1.5    |
|                                                     | 1200–1500                  | 1.8    |
|                                                     | > 1500                     | 2      |
| 4. UNEP aridity index                               | >0.55 (Humid)              | 1      |
|                                                     | 0.50–0.55 (Dry sub- humid) | 1.25   |
|                                                     | 0.30–0.50 (Semi-arid)      | 1.50   |
|                                                     | 0.10–0.30 (Arid)           | 1.75   |
|                                                     | <0.03 (Hyper-arid)         | 2      |
| 5. Average wind speed at 10m height (m/s)           | 0–1.2 (Slight)             | 1      |
|                                                     | 1.2–1.6 (Moderate)         | 1.3    |
|                                                     | 1.6–1.8 (Severe)           | 1.6    |
|                                                     | >1.8 (Very severe)         | 2      |
| 6. Rain erosivity (mm/hr)                           | <30 (Very low1)            | 1      |
|                                                     | 30–50 (Low)                | 1.3    |
|                                                     | 50–70 (Moderate)           | 1.6    |

|                 |                                         |   |
|-----------------|-----------------------------------------|---|
|                 | >70 (High)                              | 2 |
| 7. Slope aspect | Flat, North, Northeast, East, Northwest | 1 |
|                 | South, Southeast, Southwest, West       | 2 |

**Table S6.** The Socio-Economic Quality Index (SEQI) indicator, their classes and assigned weights.

| Indicators                                         | Class             | Weight |
|----------------------------------------------------|-------------------|--------|
| 1. Population density<br>(People/km <sup>2</sup> ) | <50 (Low)         | 1      |
|                                                    | 50–100 (Moderate) | 1.3    |
|                                                    | 100–300 (High)    | 1.6    |
|                                                    | >300 (Very High)  | 2      |
| 2. Population growth rate<br>(%/year)              | < 3 (Low)         | 1      |
|                                                    | 3–6 (Moderate)    | 1.3    |
|                                                    | 6–9 (High)        | 1.6    |
|                                                    | >9 (Very High)    | 2      |
| 3. Illiteracy rate (%)                             | < 4 (Low)         | 1      |
|                                                    | 4–16 (Moderate)   | 1.3    |
|                                                    | 16–24 (High)      | 1.6    |
|                                                    | >24 (Very High)   | 2      |
| 4. Work participation rate<br>(%)                  | >50 (Very High)   | 1      |
|                                                    | 40–50 (High)      | 1.3    |
|                                                    | 30–40 (Moderate)  | 1.6    |
|                                                    | <30 (Low)         | 2      |

**Disclaimer/Publisher’s Note:** The statements, opinions and data contained in all publications are solely those of the individual author(s) and contributor(s) and not of MDPI and/or the editor(s). MDPI and/or the editor(s) disclaim responsibility for any injury to people or property resulting from any ideas, methods, instructions or products referred to in the content.
